# Supplementary material for: Identification of a Genome Instability-Associated LncRNA Signature for Prognosis Prediction in Colon Cancer
Source: PubMed Central journal article supplement (PMC8215581; doi:10.3389/fgene.2021.679150), 2021-06-07
Supplement: Image_1.pdf [file Image_1.pdf]

Supplementary Material

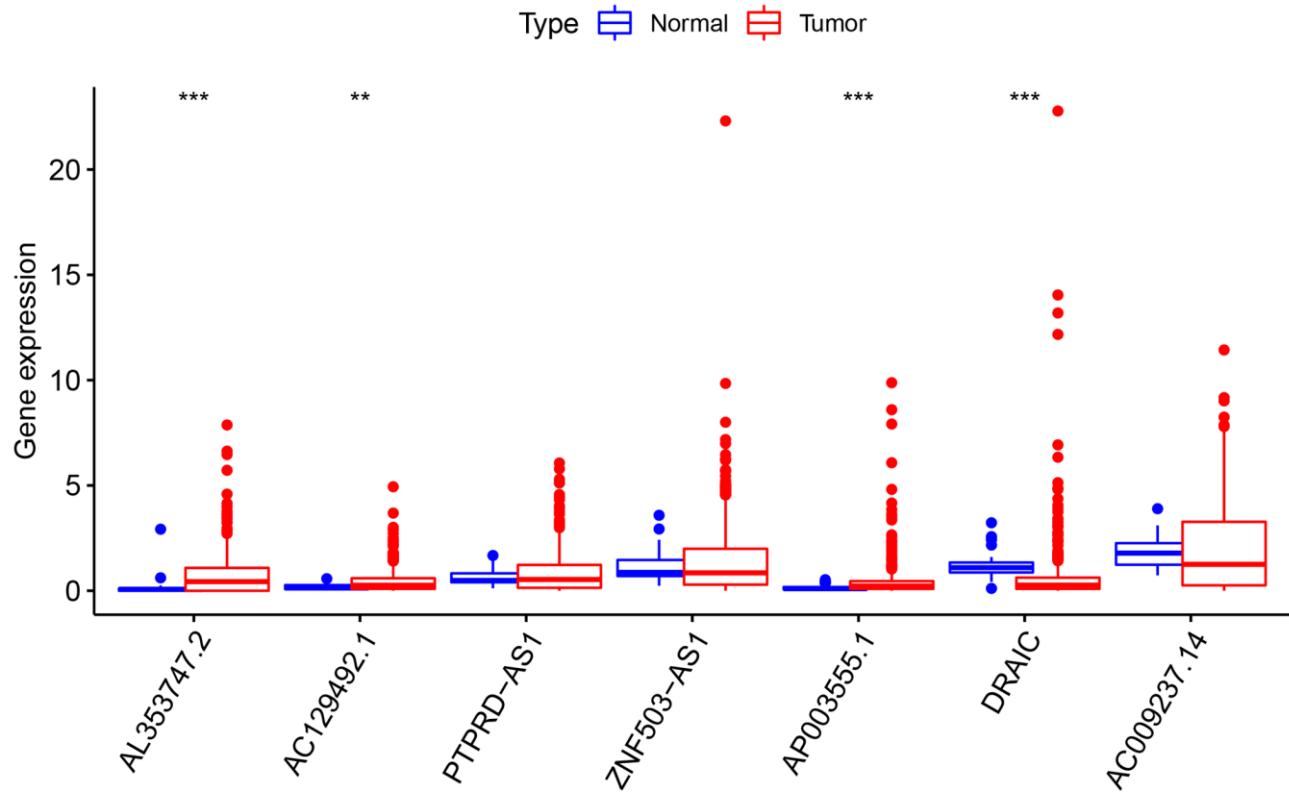

**FIGURE S1** | Expression level of lncRNAs in signature in tumor and normal tissue. \*\*,  $P$  value  $<0.01$ ; \*\*\*,  $P$  value  $<0.001$ .
